# Supplementary material
Source: PubMed Central journal article supplement (PMC7028511)

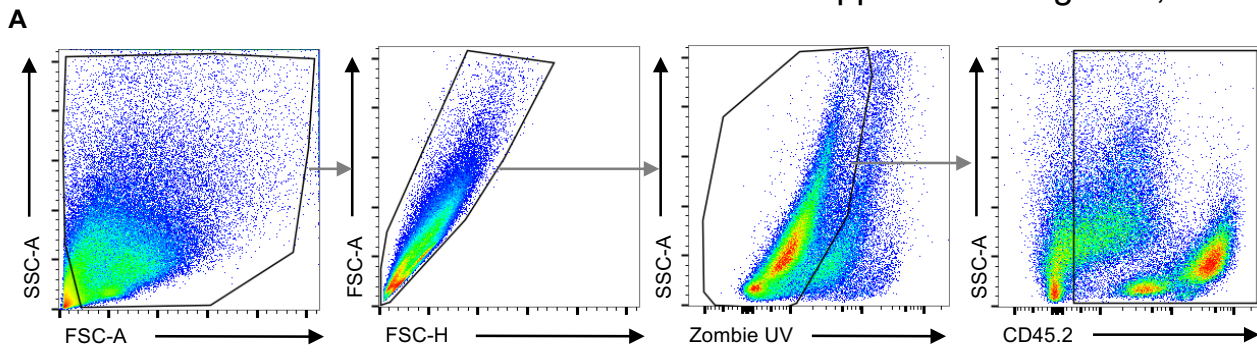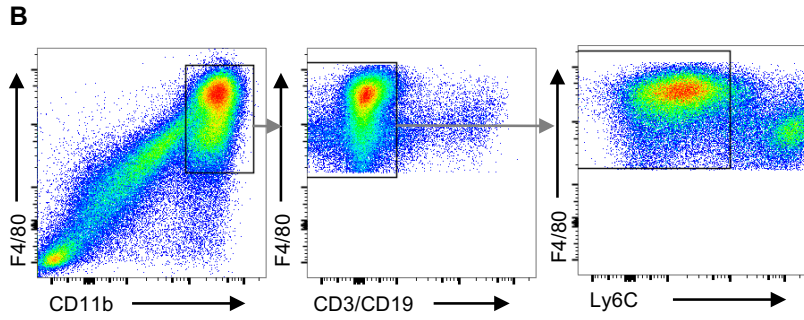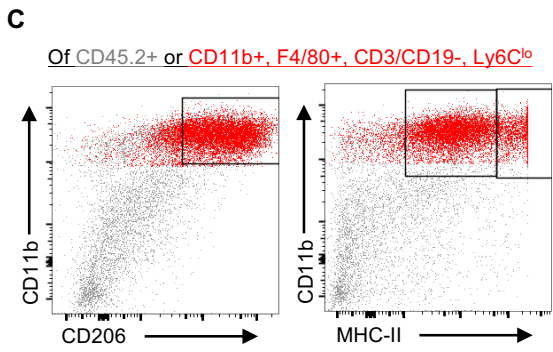

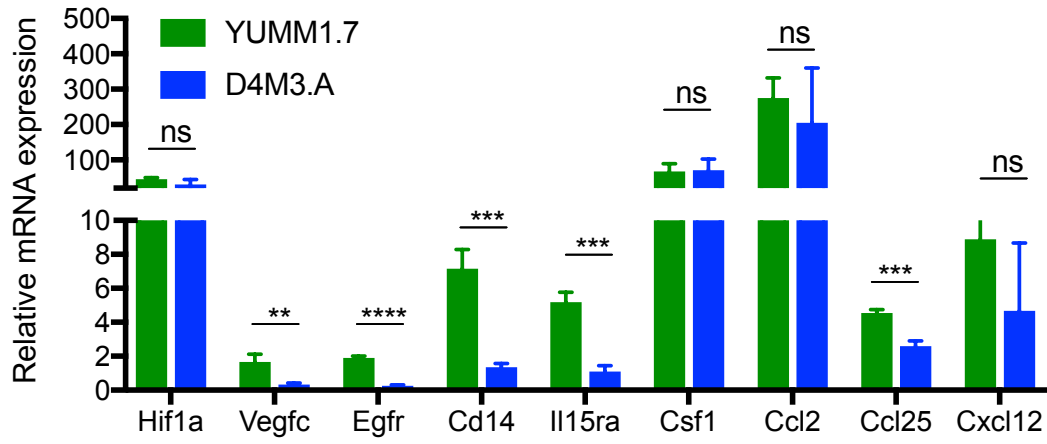

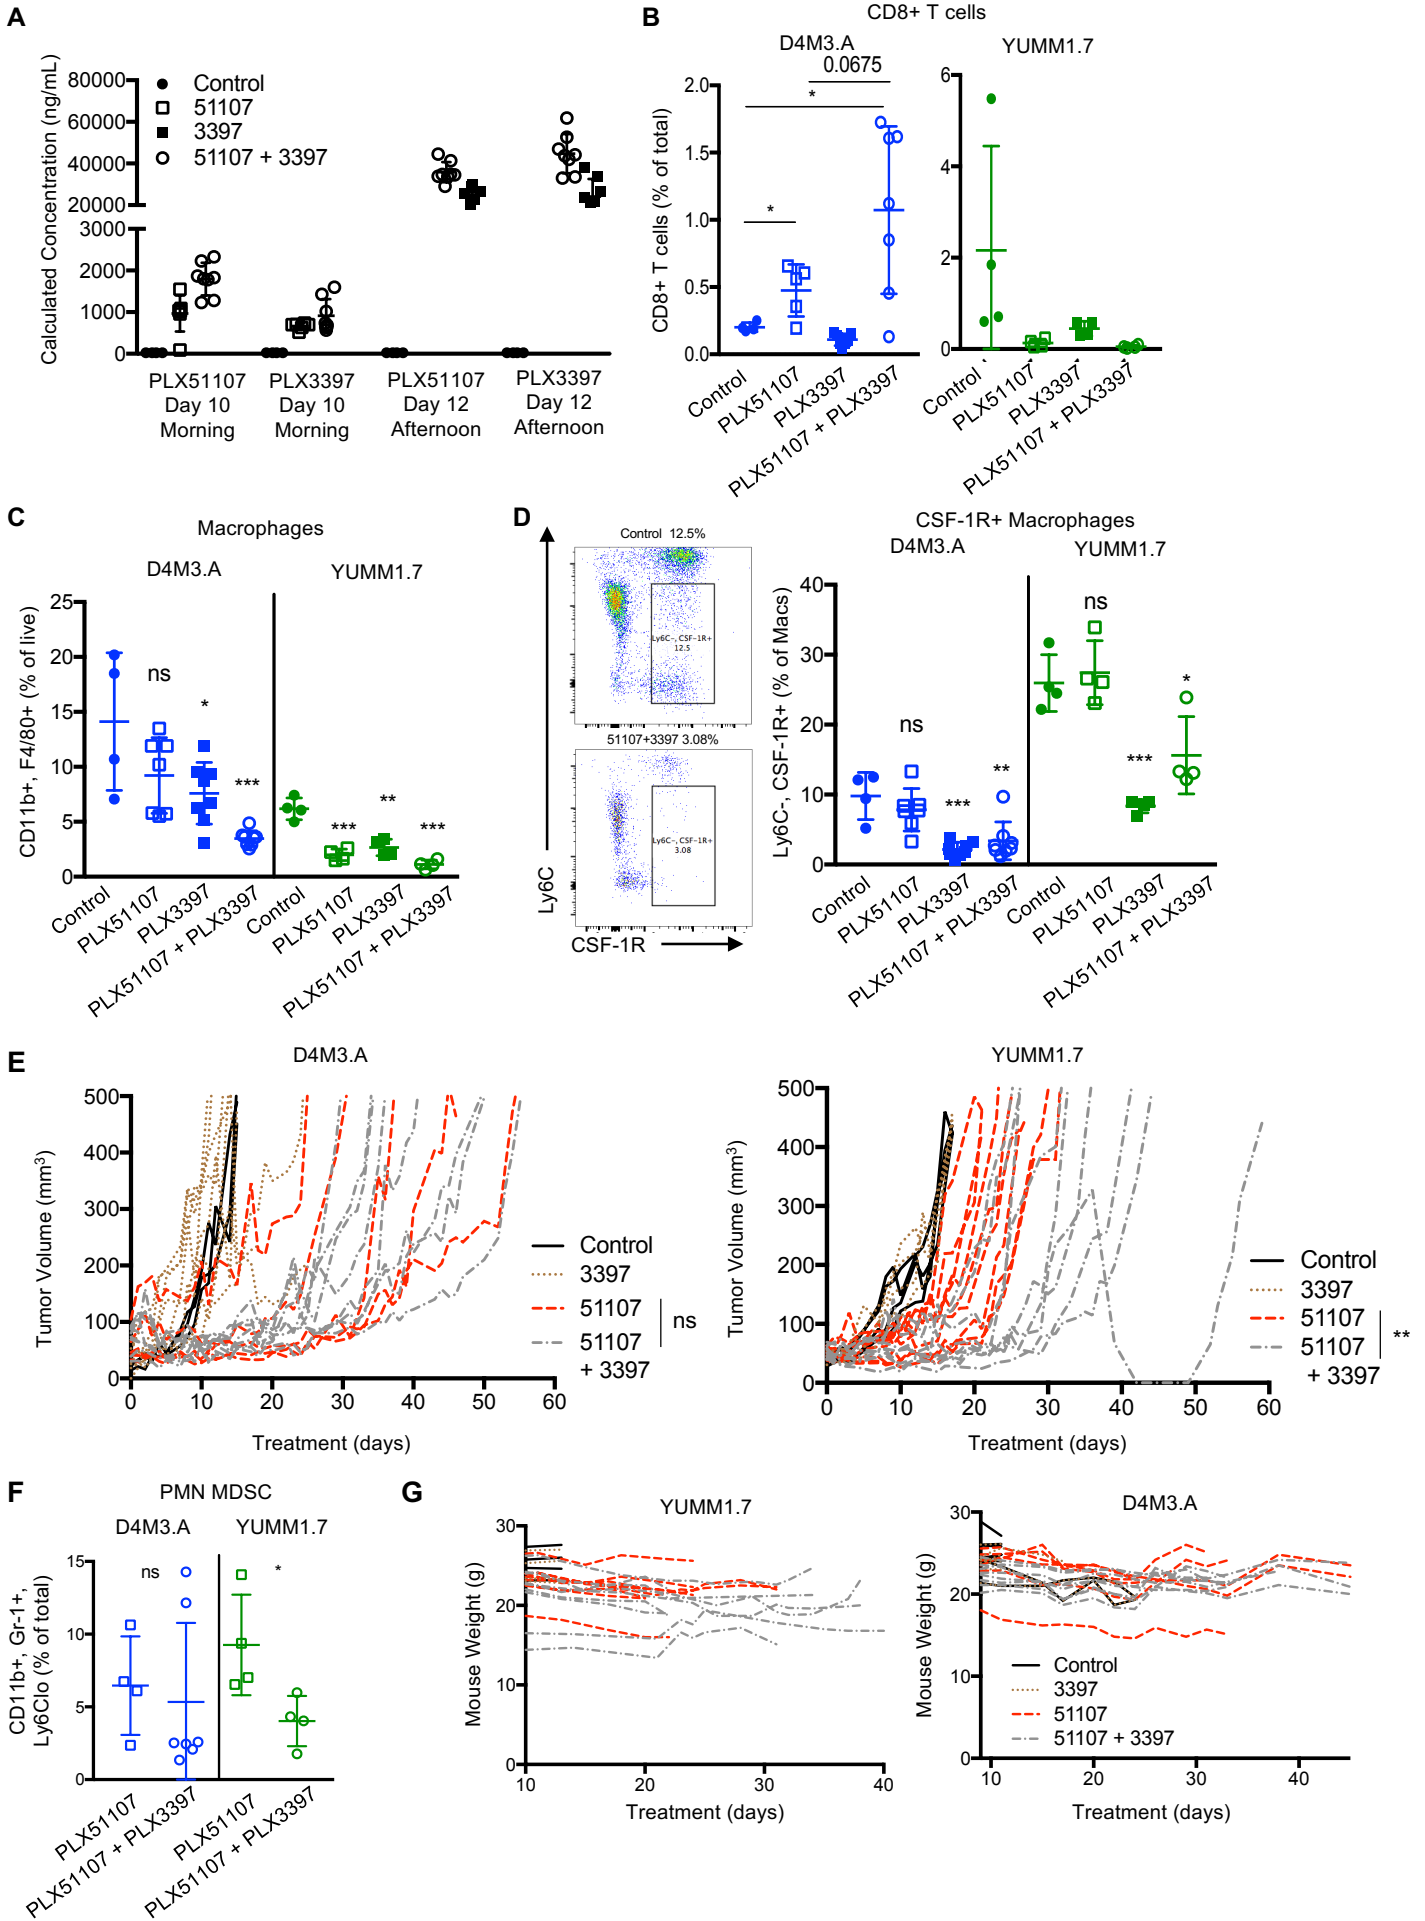

**A**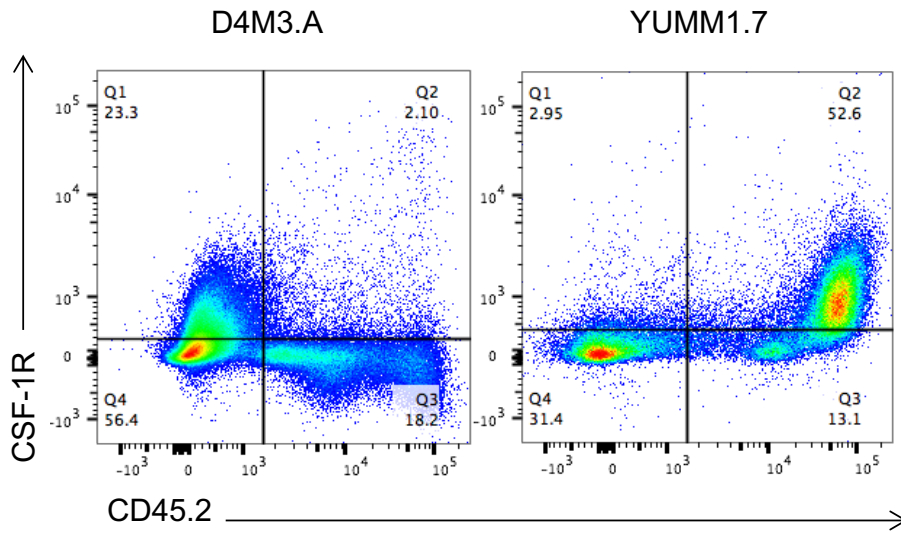**B**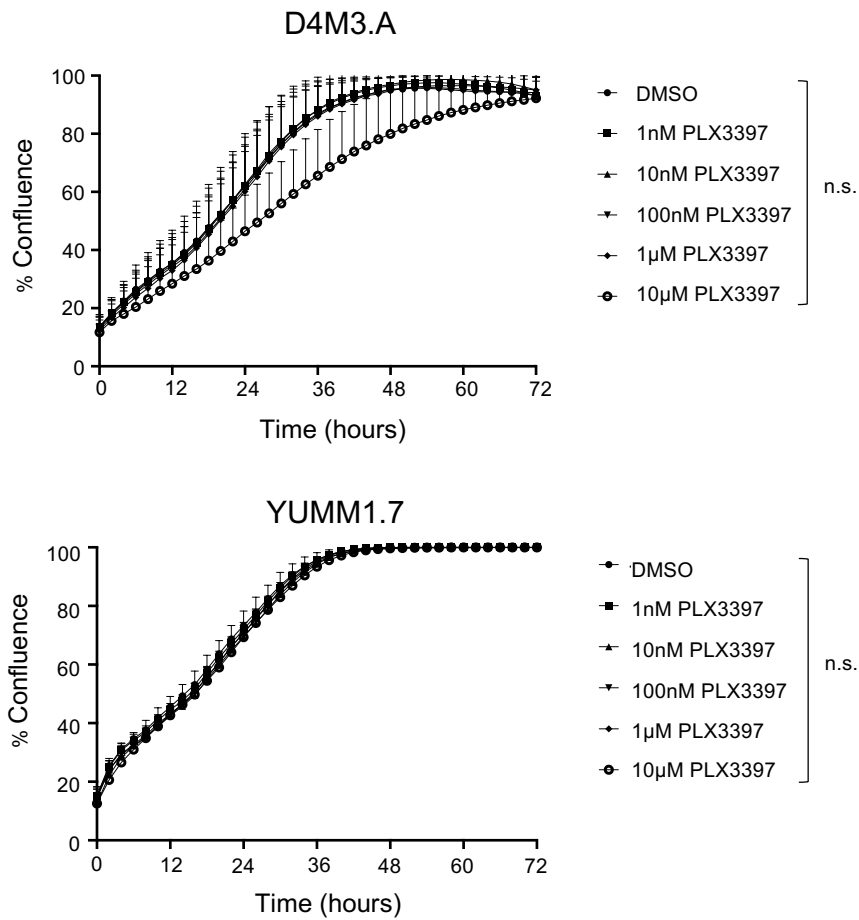

Supplement: NIHMS1058573-supplement-Supp_figS1-4.pdf [file NIHMS1058573-supplement-Supp_figS1-4.pdf]
